# Supplementary material
Source: Springer Nature journal article supplement (https://www.springermedizin.de/resource/supplementary/13012_2011_482_MOESM3_ESM.pdf/9630076)
Supplement: MOESM3 [file 9630076]

**Additional File 3. Mantel correlation values by participant**

| Participant | Mantel correlation |
|-------------|--------------------|
| 1           | 0.18               |
| 2           | 0.16               |
| 3           | 0.13               |
| 4           | 0.16               |
| 5           | 0.13               |
| 6           | 0.13               |
| 7           | 0.23               |
| 8           | 0.21               |
| 9           | 0.24               |
| 10          | 0.17               |
| 11          | 0.16               |
| 12          | 0.17               |
| 13          | 0.15               |
| 14          | 0.21               |
| 15          | 0.17               |
| 16          | 0.22               |
| 17          | 0.17               |
| 18          | 0.19               |
| 19          | 0.14               |

Values based on 1,000 permutations,  
all corrected  $p$ -values  $<0.02$ .
